# Supplementary material for: Cidofovir is active against human papillomavirus positive and negative head and neck and cervical tumor cells by causing DNA damage as one of its working mechanisms
Source: PubMed Central journal article supplement (PMC5216943; doi:10.18632/oncotarget.10100), 2016-06-16
Supplement: oncotarget-07-47302-s001.pdf [file oncotarget-07-47302-s001.pdf]

## Cidofovir is active against human papillomavirus positive and negative head and neck and cervical tumor cells by causing DNA damage as one of its working mechanisms

### Supplementary Materials

**Supplementary Table S1: Primers used for HPV typing by means of PCR**

| Primers used for PCR |              |                               |                      |
|----------------------|--------------|-------------------------------|----------------------|
| HPV type             | E6/E7 primer | sequence (5'-3')              | amplicon length (bp) |
| HPV 16               | forward      | GTG GAC CGG TCG ATG TAT GTC T | 209                  |
|                      | reverse      | TCC GGT TCT GCT TGT CCA GC    |                      |
| HPV 18               | forward      | AGT GCC ATT CGT GCT GCA AC    | 98                   |
|                      | reverse      | ATG TTG CCT TAG GTC CAT GCA T |                      |
| HPV 33               | forward      | AAT ATT TCG GGT CGT TGG GC    | 109                  |
|                      | reverse      | ACC GTT GGC TTG TGT CCT CTC A |                      |

HPV typing was performed using specific forward and reverse primers for E6/E7 of HPV 16, 18 and 33.
